# Supplementary material for: Surface Water Intrusion, Land Use Impacts, and Bacterial Community Composition in Shallow Groundwater Wells Supplying Potable Water in Sparsely Populated Areas of a Boreal Region
Source: PubMed Central journal article supplement (PMC8567237; doi:10.1128/spectrum.00179-21), 2021-11-03
Supplement: spectrum00179-21_supp_1_seq14.pdf [file spectrum00179-21_supp_1_seq14.pdf]

## Supplementary material

**Table S1.** Spearman rank correlation coefficients showing no significant correlations between environmental data and bacterial alpha diversity

| Environmental parameter                               | Alpha diversity metric   | Spearman correlation coefficient | p-value     |
|-------------------------------------------------------|--------------------------|----------------------------------|-------------|
| Total length of nearby roads                          | Faith's PD (DNA)         | 0.338961199                      | 0.077647925 |
| Total length of nearby major roads                    | Faith's PD (DNA)         | 0.084217168                      | 0.670052308 |
| Total nearby field area                               | Faith's PD (DNA)         | -0.26972674                      | 0.165115085 |
| Total nearby marsh area                               | Faith's PD (DNA)         | 0.062944718                      | 0.750331453 |
| Distance to nearest marsh                             | Faith's PD (DNA)         | 0.207198579                      | 0.290082935 |
| Total length of nearby ditches                        | Faith's PD (DNA)         | 0.150519978                      | 0.444548376 |
| Distance to nearest surface water                     | Faith's PD (DNA)         | 0.050410989                      | 0.798916228 |
| Distance to nearest surface water (excluding ditches) | Faith's PD (DNA)         | 0.137968798                      | 0.483841972 |
| Total nearby surface water area (excluding ditches)   | Faith's PD (DNA)         | 0.097079563                      | 0.623115481 |
| Number of nearby buildings                            | Faith's PD (DNA)         | 0.086204959                      | 0.66271321  |
| Total length of nearby roads                          | Faith's PD (cDNA)        | -0.08096644                      | 0.682118124 |
| Total length of nearby major roads                    | Faith's PD (cDNA)        | 0.177086784                      | 0.367329493 |
| Total nearby field area                               | Faith's PD (cDNA)        | -0.221738547                     | 0.256784845 |
| Total nearby marsh area                               | Faith's PD (cDNA)        | 0.05801861                       | 0.769326798 |
| Distance to nearest marsh                             | Faith's PD (cDNA)        | 0.035308609                      | 0.858430326 |
| Total length of nearby ditches                        | Faith's PD (cDNA)        | 0.10180624                       | 0.606210787 |
| Distance to nearest surface water                     | Faith's PD (cDNA)        | 0.009315074                      | 0.962477873 |
| Distance to nearest surface water (excluding ditches) | Faith's PD (cDNA)        | 0.199014516                      | 0.30997461  |
| Total nearby surface water area (excluding ditches)   | Faith's PD (cDNA)        | -0.092666856                     | 0.639067996 |
| Number of nearby buildings                            | Faith's PD (cDNA)        | -0.191353047                     | 0.329344959 |
| Total length of nearby roads                          | Pielou's evenness (DNA)  | 0.251682121                      | 0.196366364 |
| Total length of nearby major roads                    | Pielou's evenness (DNA)  | 0.221502687                      | 0.257304169 |
| Total nearby field area                               | Pielou's evenness (DNA)  | -0.317163345                     | 0.10006697  |
| Total nearby marsh area                               | Pielou's evenness (DNA)  | 0.150519978                      | 0.444548376 |
| Distance to nearest marsh                             | Pielou's evenness (DNA)  | 0.07691255                       | 0.69727259  |
| Total length of nearby ditches                        | Pielou's evenness (DNA)  | 0.195402299                      | 0.319017265 |
| Distance to nearest surface water                     | Pielou's evenness (DNA)  | 0.128219255                      | 0.515542471 |
| Distance to nearest surface water (excluding ditches) | Pielou's evenness (DNA)  | 0.318094729                      | 0.099019491 |
| Total nearby surface water area (excluding ditches)   | Pielou's evenness (DNA)  | 0.003861119                      | 0.984442524 |
| Number of nearby buildings                            | Pielou's evenness (DNA)  | 0.001921767                      | 0.992256343 |
| Total length of nearby roads                          | Pielou's evenness (cDNA) | -0.026348401                     | 0.894123106 |
| Total length of nearby major roads                    | Pielou's evenness (cDNA) | 0.237077095                      | 0.224477084 |
| Total nearby field area                               | Pielou's evenness (cDNA) | -0.15058364                      | 0.444353549 |
| Total nearby marsh area                               | Pielou's evenness (cDNA) | 0.105637657                      | 0.592651535 |
| Distance to nearest marsh                             | Pielou's evenness (cDNA) | -0.066785275                     | 0.735619626 |
| Total length of nearby ditches                        | Pielou's evenness (cDNA) | 0.063492063                      | 0.748229402 |
| Distance to nearest surface water                     | Pielou's evenness (cDNA) | 0.106849379                      | 0.588390711 |
| Distance to nearest surface water (excluding ditches) | Pielou's evenness (cDNA) | 0.308239814                      | 0.110528082 |
| Total nearby surface water area (excluding ditches)   | Pielou's evenness (cDNA) | -0.114730393                     | 0.56100968  |
| Number of nearby buildings                            | Pielou's evenness (cDNA) | -0.10624624                      | 0.590509889 |
| Total length of nearby roads                          | Observed ASVs (DNA)      | 0.333471949                      | 0.082891537 |
| Total length of nearby major roads                    | Observed ASVs (DNA)      | 0.163819696                      | 0.404856147 |

|                                                       |                            |              |             |
|-------------------------------------------------------|----------------------------|--------------|-------------|
| Total nearby field area                               | Observed ASVs (DNA)        | -0.285722805 | 0.140508783 |
| Total nearby marsh area                               | Observed ASVs (DNA)        | 0.103448276  | 0.600383683 |
| Distance to nearest marsh                             | Observed ASVs (DNA)        | 0.123169565  | 0.532350412 |
| Total length of nearby ditches                        | Observed ASVs (DNA)        | 0.144499179  | 0.463179871 |
| Distance to nearest surface water                     | Observed ASVs (DNA)        | 0.084931558  | 0.667411262 |
| Distance to nearest surface water (excluding ditches) | Observed ASVs (DNA)        | 0.19162333   | 0.328649318 |
| Total nearby surface water area (excluding ditches)   | Observed ASVs (DNA)        | 0.099285917  | 0.615200622 |
| Number of nearby buildings                            | Observed ASVs (DNA)        | 0.129581977  | 0.511051506 |
| Total length of nearby roads                          | Observed ASVs (cDNA)       | -0.076026115 | 0.700601747 |
| Total length of nearby major roads                    | Observed ASVs (cDNA)       | 0.180547763  | 0.357887037 |
| Total nearby field area                               | Observed ASVs (cDNA)       | -0.241044142 | 0.216587883 |
| Total nearby marsh area                               | Observed ASVs (cDNA)       | 0.05801861   | 0.769326798 |
| Distance to nearest marsh                             | Observed ASVs (cDNA)       | 0.030655536  | 0.876936226 |
| Total length of nearby ditches                        | Observed ASVs (cDNA)       | 0.106185003  | 0.590725235 |
| Distance to nearest surface water                     | Observed ASVs (cDNA)       | 0.031780841  | 0.872454554 |
| Distance to nearest surface water (excluding ditches) | Observed ASVs (cDNA)       | 0.221188073  | 0.257997963 |
| Total nearby surface water area (excluding ditches)   | Observed ASVs (cDNA)       | -0.127416926 | 0.518195596 |
| Number of nearby buildings                            | Observed ASVs (cDNA)       | -0.185038671 | 0.345851284 |
| Total length of nearby roads                          | Shannon's diversity (DNA)  | 0.293949347  | 0.128941819 |
| Total length of nearby major roads                    | Shannon's diversity (DNA)  | 0.230731966  | 0.237492882 |
| Total nearby field area                               | Shannon's diversity (DNA)  | -0.312750637 | 0.105142986 |
| Total nearby marsh area                               | Shannon's diversity (DNA)  | 0.140120416  | 0.476982788 |
| Distance to nearest marsh                             | Shannon's diversity (DNA)  | 0.087313536  | 0.658633394 |
| Total length of nearby ditches                        | Shannon's diversity (DNA)  | 0.195949644  | 0.317636729 |
| Distance to nearest surface water                     | Shannon's diversity (DNA)  | 0.114520617  | 0.561730919 |
| Distance to nearest surface water (excluding ditches) | Shannon's diversity (DNA)  | 0.298932396  | 0.122282958 |
| Total nearby surface water area (excluding ditches)   | Shannon's diversity (DNA)  | 0.041369132  | 0.834437543 |
| Number of nearby buildings                            | Shannon's diversity (DNA)  | 0.065340065  | 0.741145331 |
| Total length of nearby roads                          | Shannon's diversity (cDNA) | -0.055990352 | 0.777186586 |
| Total length of nearby major roads                    | Shannon's diversity (cDNA) | 0.179970933  | 0.359450713 |
| Total nearby field area                               | Shannon's diversity (cDNA) | -0.124107396 | 0.529209216 |
| Total nearby marsh area                               | Shannon's diversity (cDNA) | 0.04378763   | 0.824902153 |
| Distance to nearest marsh                             | Shannon's diversity (cDNA) | 0.003831942  | 0.984560072 |
| Total length of nearby ditches                        | Shannon's diversity (cDNA) | 0.054734537  | 0.782063878 |
| Distance to nearest surface water                     | Shannon's diversity (cDNA) | 0.048767153  | 0.805347221 |
| Distance to nearest surface water (excluding ditches) | Shannon's diversity (cDNA) | 0.237886677  | 0.222851606 |
| Total nearby surface water area (excluding ditches)   | Shannon's diversity (cDNA) | -0.118039923 | 0.549687252 |
| Number of nearby buildings                            | Shannon's diversity (cDNA) | -0.143857958 | 0.465187961 |
